# Supplementary material
Source: HighWire-hosted journal article supplement (http://www.qdcxjkg.com/highwire/filestream/113468/field_highwire_adjunct_files/0/ERJ_00656-2012_Disclosures.pdf)
Supplement: ERJ_00656-2012_Disclosures.pdf [file ERJ_00656-2012_Disclosures.pdf]

E. Catherinot's travel to the ERS congress and CPLF congress was funded by LVL Medical.
